# Supplementary material for: Characterization of Source–Sink Traits and Carbon Translocation in Maize Hybrids under High Plant Density
Source: MDPI journal article supplement (doi:10.3390/agronomy12040961), 2022-04-15
Supplement: s1 [file s1]

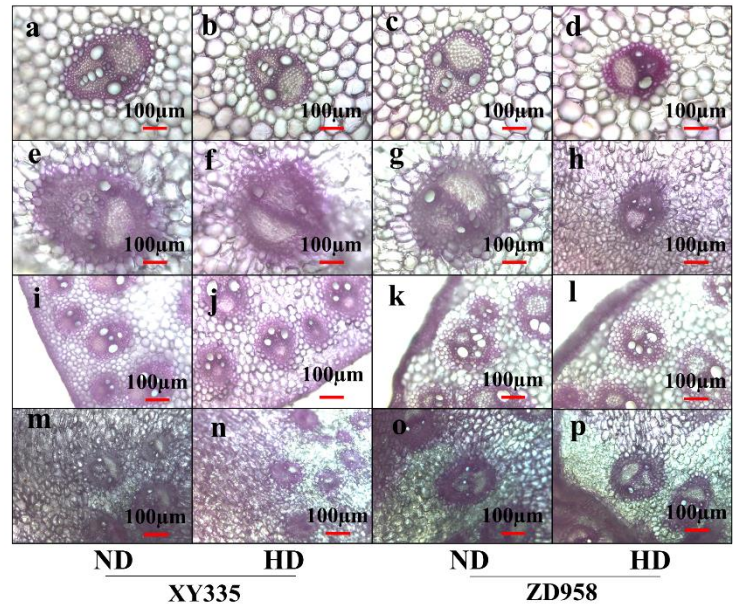

**Figure S1.** Micrograph of big and small vascular bundles structure in peduncle and cob internode. Big vascular bundle in peduncle internode (a-d) and cob internode (e-h); small vascular bundle in peduncle internode (i-l) and cob internode (m-p) in 2018. ND and HD indicate 60000 and 90000 plants ha<sup>-1</sup> density, respectively.
